# Supplementary material for: Quantitative proteomics reveals the importance of nitrogen source to control glucosinolate metabolism in Arabidopsis thaliana and Brassica oleracea
Source: PubMed Central journal article supplement (PMC4892723; doi:10.1093/jxb/erw147), 2016-04-16

**Table S1.** Identification and quantification of glucosinolates by LC-MS in leaves of Arabidopsis plants grown under nitrate or ammonium nutrition.

| Systematic name                 | Common name           | Content (mg . g FW) |              |
|---------------------------------|-----------------------|---------------------|--------------|
|                                 |                       | Nitrate             | Ammonium     |
| 3-methylsulfinylpropyl – GLS    | Glucoiberin           | n.q.                | n.q.         |
| 4-methylsulfinylbutyl – GLS     | Glucoraphanin         | 0.107 ± 0.01        | 0.212 ± 0.02 |
| 5-methylsulfinylpentyl – GLS    | Glucoalyssin          | n.q.                | n.q.         |
| 6-methylsulfinylhexyl – GLS     | Glucohesperin         | n.q.                | n.q.         |
| 7-methylsulfinylheptyl – GLS    | Glucosibarin          | n.q.                | n.q.         |
| 4-methylthiobutyl – GLS         | Glucoerucin           | n.q.                | n.q.         |
| 8-methylsulfinyloctyl – GLS     | Glucohirsutin         | n.q.                | n.q.         |
| 3-indolylmethyl – GLS           | Glucobrassicin        | 0.051 ± 0.01        | 0.039 ± 0.00 |
| 4-methoxy-3-indolylmethyl – GLS | Methoxyglucobrassicin | 0.013 ± 0.00        | 0.023 ± 0.00 |
| 1-methoxy-3-indolylmethyl – GLS | Neoglucobrassicin     | 0.020 ± 0.00        | 0.029 ± 0.00 |

**Figures S1.** Myrosinase activity of *Arabidopsis thaliana* plants grown under different nitrogen sources: 1 mM  $(\text{NH}_4)_2\text{SO}_4$ , 1 mM  $\text{Ca}(\text{NO}_3)_2$  + 1 mM  $\text{CaSO}_4$ , and 2 mM  $\text{NH}_4\text{Cl}$ . Values represent mean  $\pm$  se (n = 3). Statistical differences according to a Student's t-test P-value  $\leq 0.05$  are indicated by an asterisk.

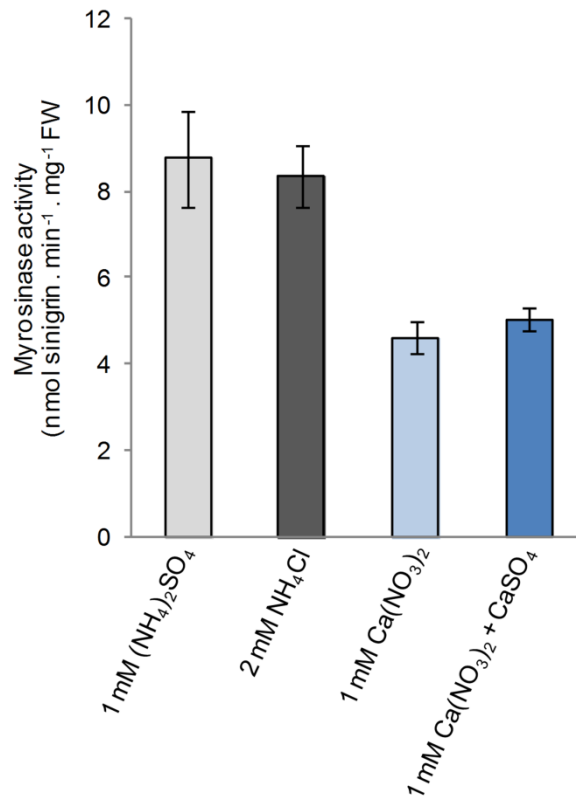

**Figure S2.** Volcano plot representing the fold-change of identified proteins with associated  $P$  values from the pair-wise quantitative comparisons of plants grown under nitrate or ammonium nutrition. In green, very significantly changed proteins ( $P < 0.01$ ), in blue, significantly changed proteins ( $P < 0.05$ ) and in red, unchanged proteins between the treatments..

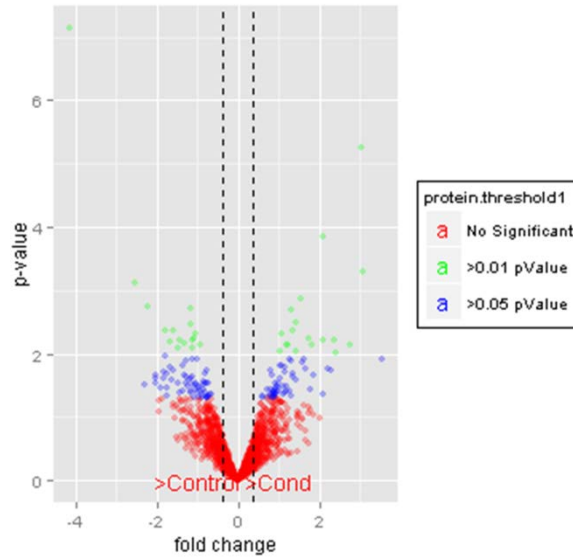

**Figure S3.** Biological process GO enrichment analysis of all the differentially expressed proteins with respect to the N source. The analysis was done using the BioMaps module of VirtualPlant 1.3 software. The p-value corresponding to each term is indicated inside the diagram boxes ( $p < 0.01$ ).

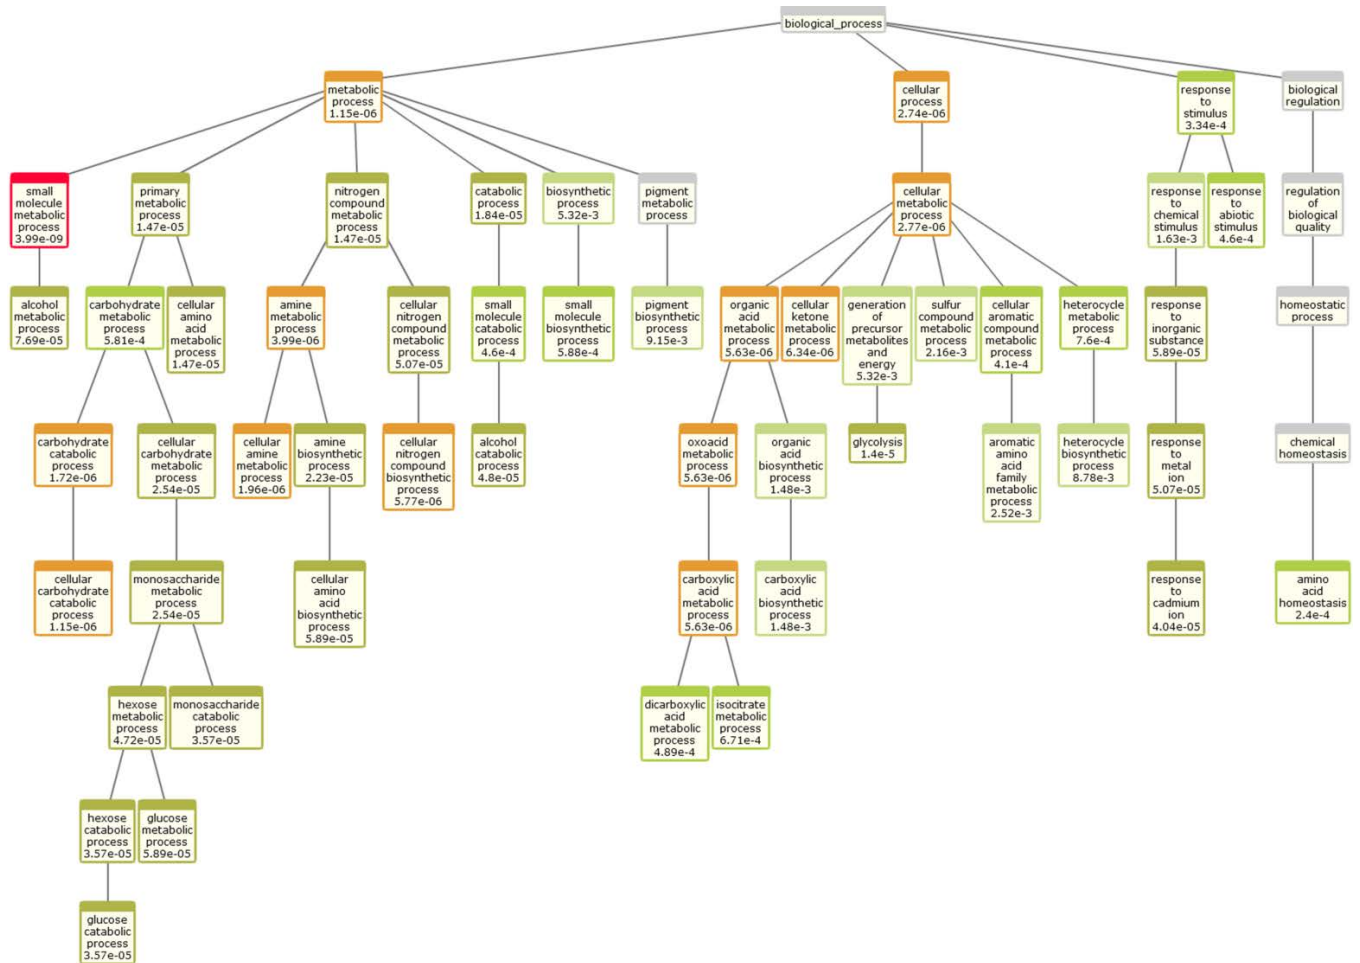

**Figure S4.** Biological process GO enrichment analysis of the differentially expressed proteins found with higher abundance under nitrate nutrition. The analysis was done using the BioMaps module of VirtualPlant 1.3 software. The p-value corresponding to each term is indicated inside the diagram boxes ( $p < 0.01$ ).

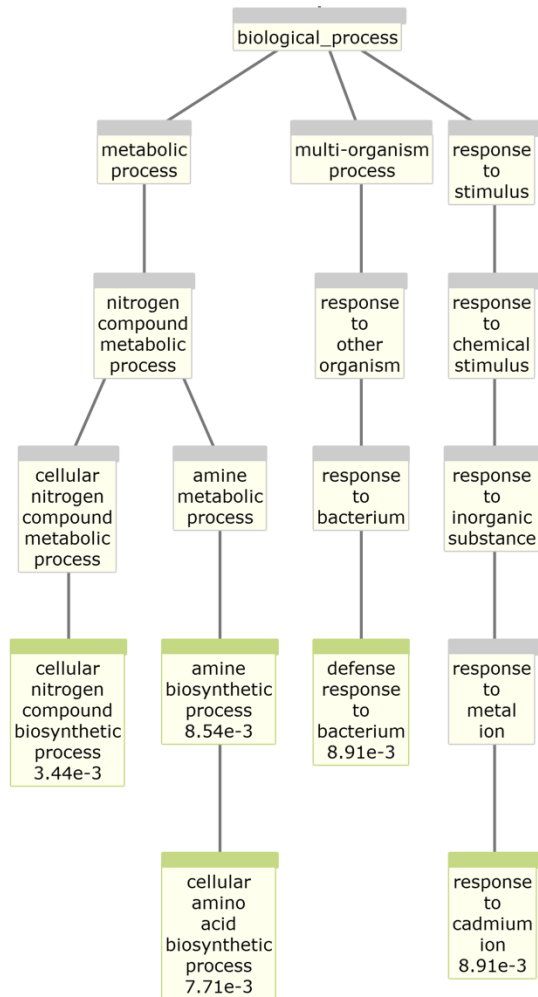

Supplement: supp_erw147_supplementary_table_S1_figures_S1_S4.pdf [file supp_erw147_supplementary_table_S1_figures_S1_S4.pdf]
